# Supplementary material for: circMAP3K4 regulates insulin resistance in trophoblast cells during gestational diabetes mellitus by modulating the miR-6795-5p/PTPN1 axis
Source: Springer Nature journal article supplement (doi:10.1186/s12967-022-03386-8), 2022-04-21

**■** Number of pathways in miRNA-independent manner

**■** Number of pathways in miRNA-dependent manner

**Rap1 signaling pathway**

**Gap junction**

**Pathways in cancer**

**Estrogen signaling pathway**

**Prolactin signaling pathway**

**Insulin signaling pathway**

**Oxytocin signaling pathway**

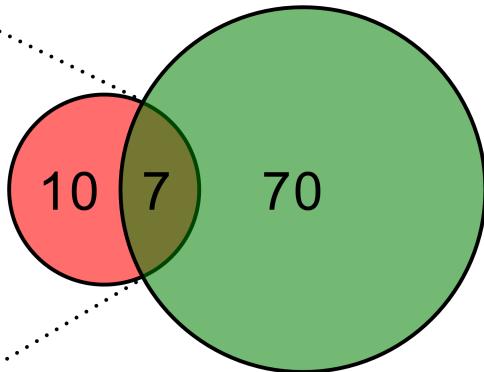

Supplement: MOESM5 [file 20330416]
