# Supplementary material for: circMAP3K4 regulates insulin resistance in trophoblast cells during gestational diabetes mellitus by modulating the miR-6795-5p/PTPN1 axis
Source: Springer Nature journal article supplement (doi:10.1186/s12967-022-03386-8), 2022-04-21

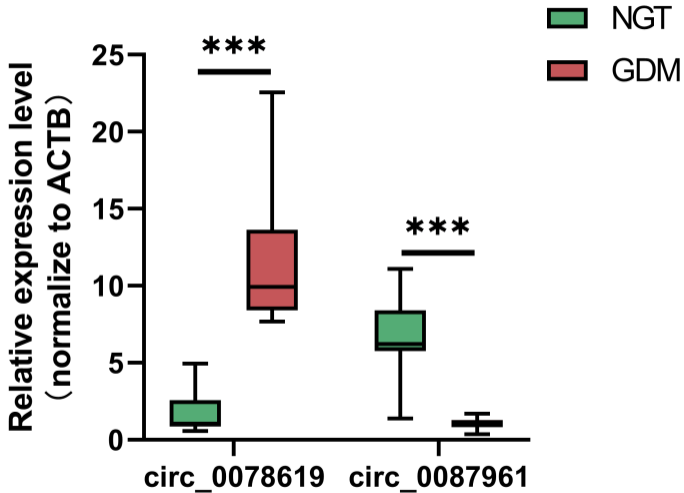

Supplement: MOESM6 [file 20330416]
